# Supplementary material
Source: PubMed Central journal article supplement (PMC5810934)
Supplement: NIHMS935629-supplement-1.pdf [file NIHMS935629-supplement-1.pdf]

## CMT-luc

**A**

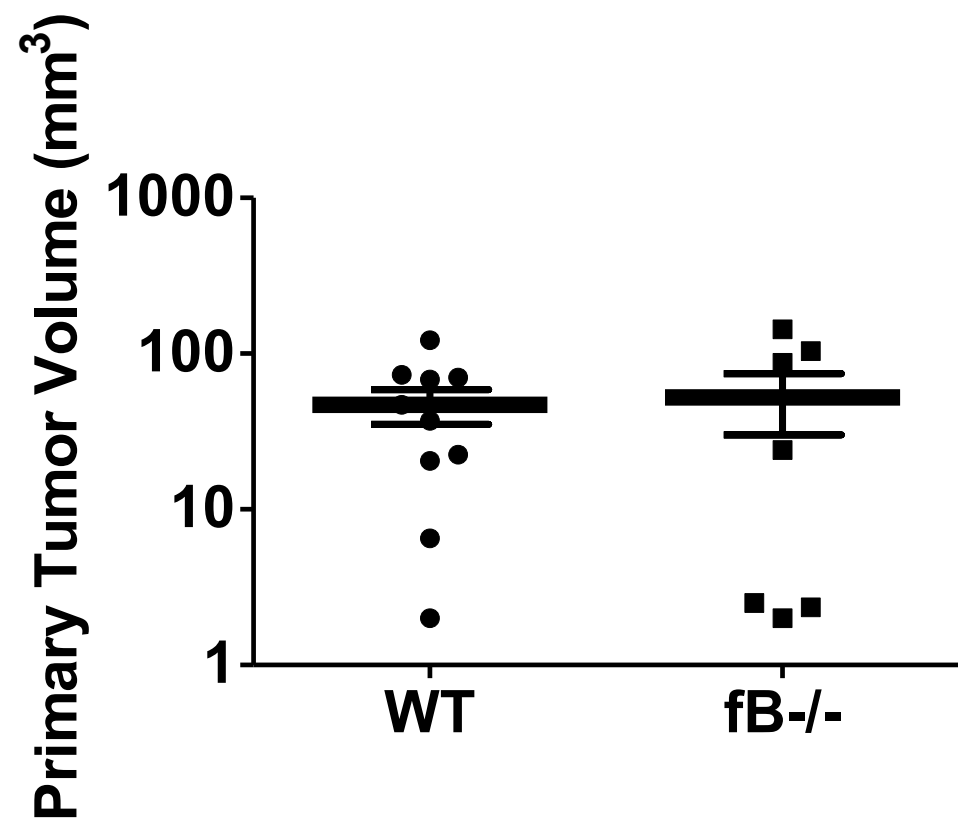

**B**

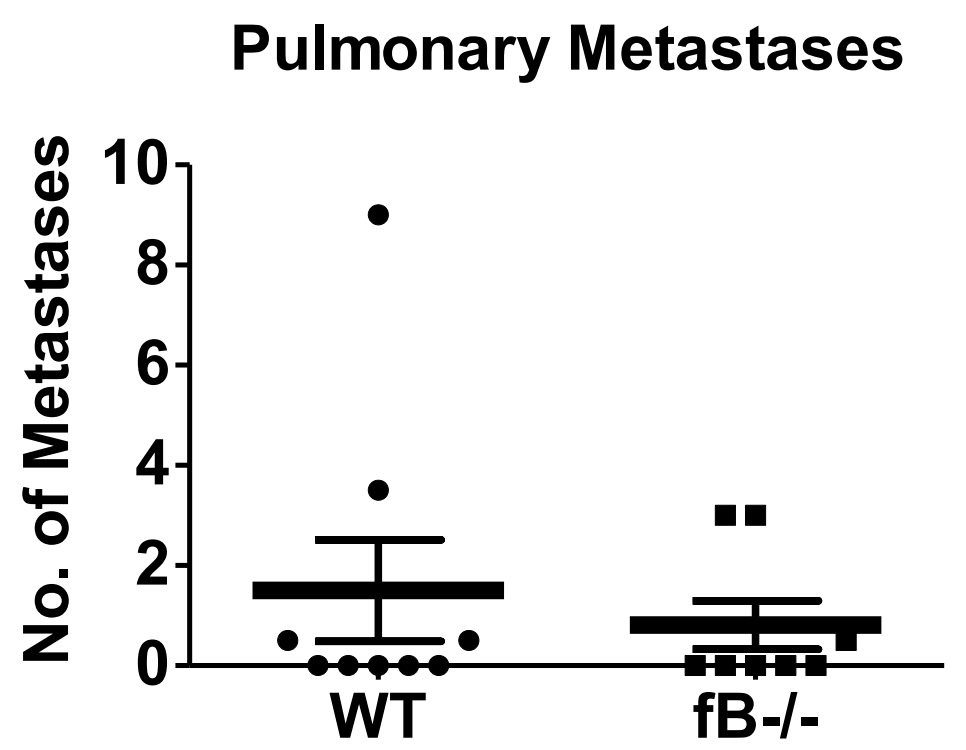

**Supplemental Figure 1. Tumor Growth in factor B<sup>-/-</sup> mice** (A and B) Primary tumor volumes and the number of metastases to secondary pulmonary spaces 28 days after CMT-luc implantation in WT or fB<sup>-/-</sup> mice are shown. Error bars represent mean ± SEM.

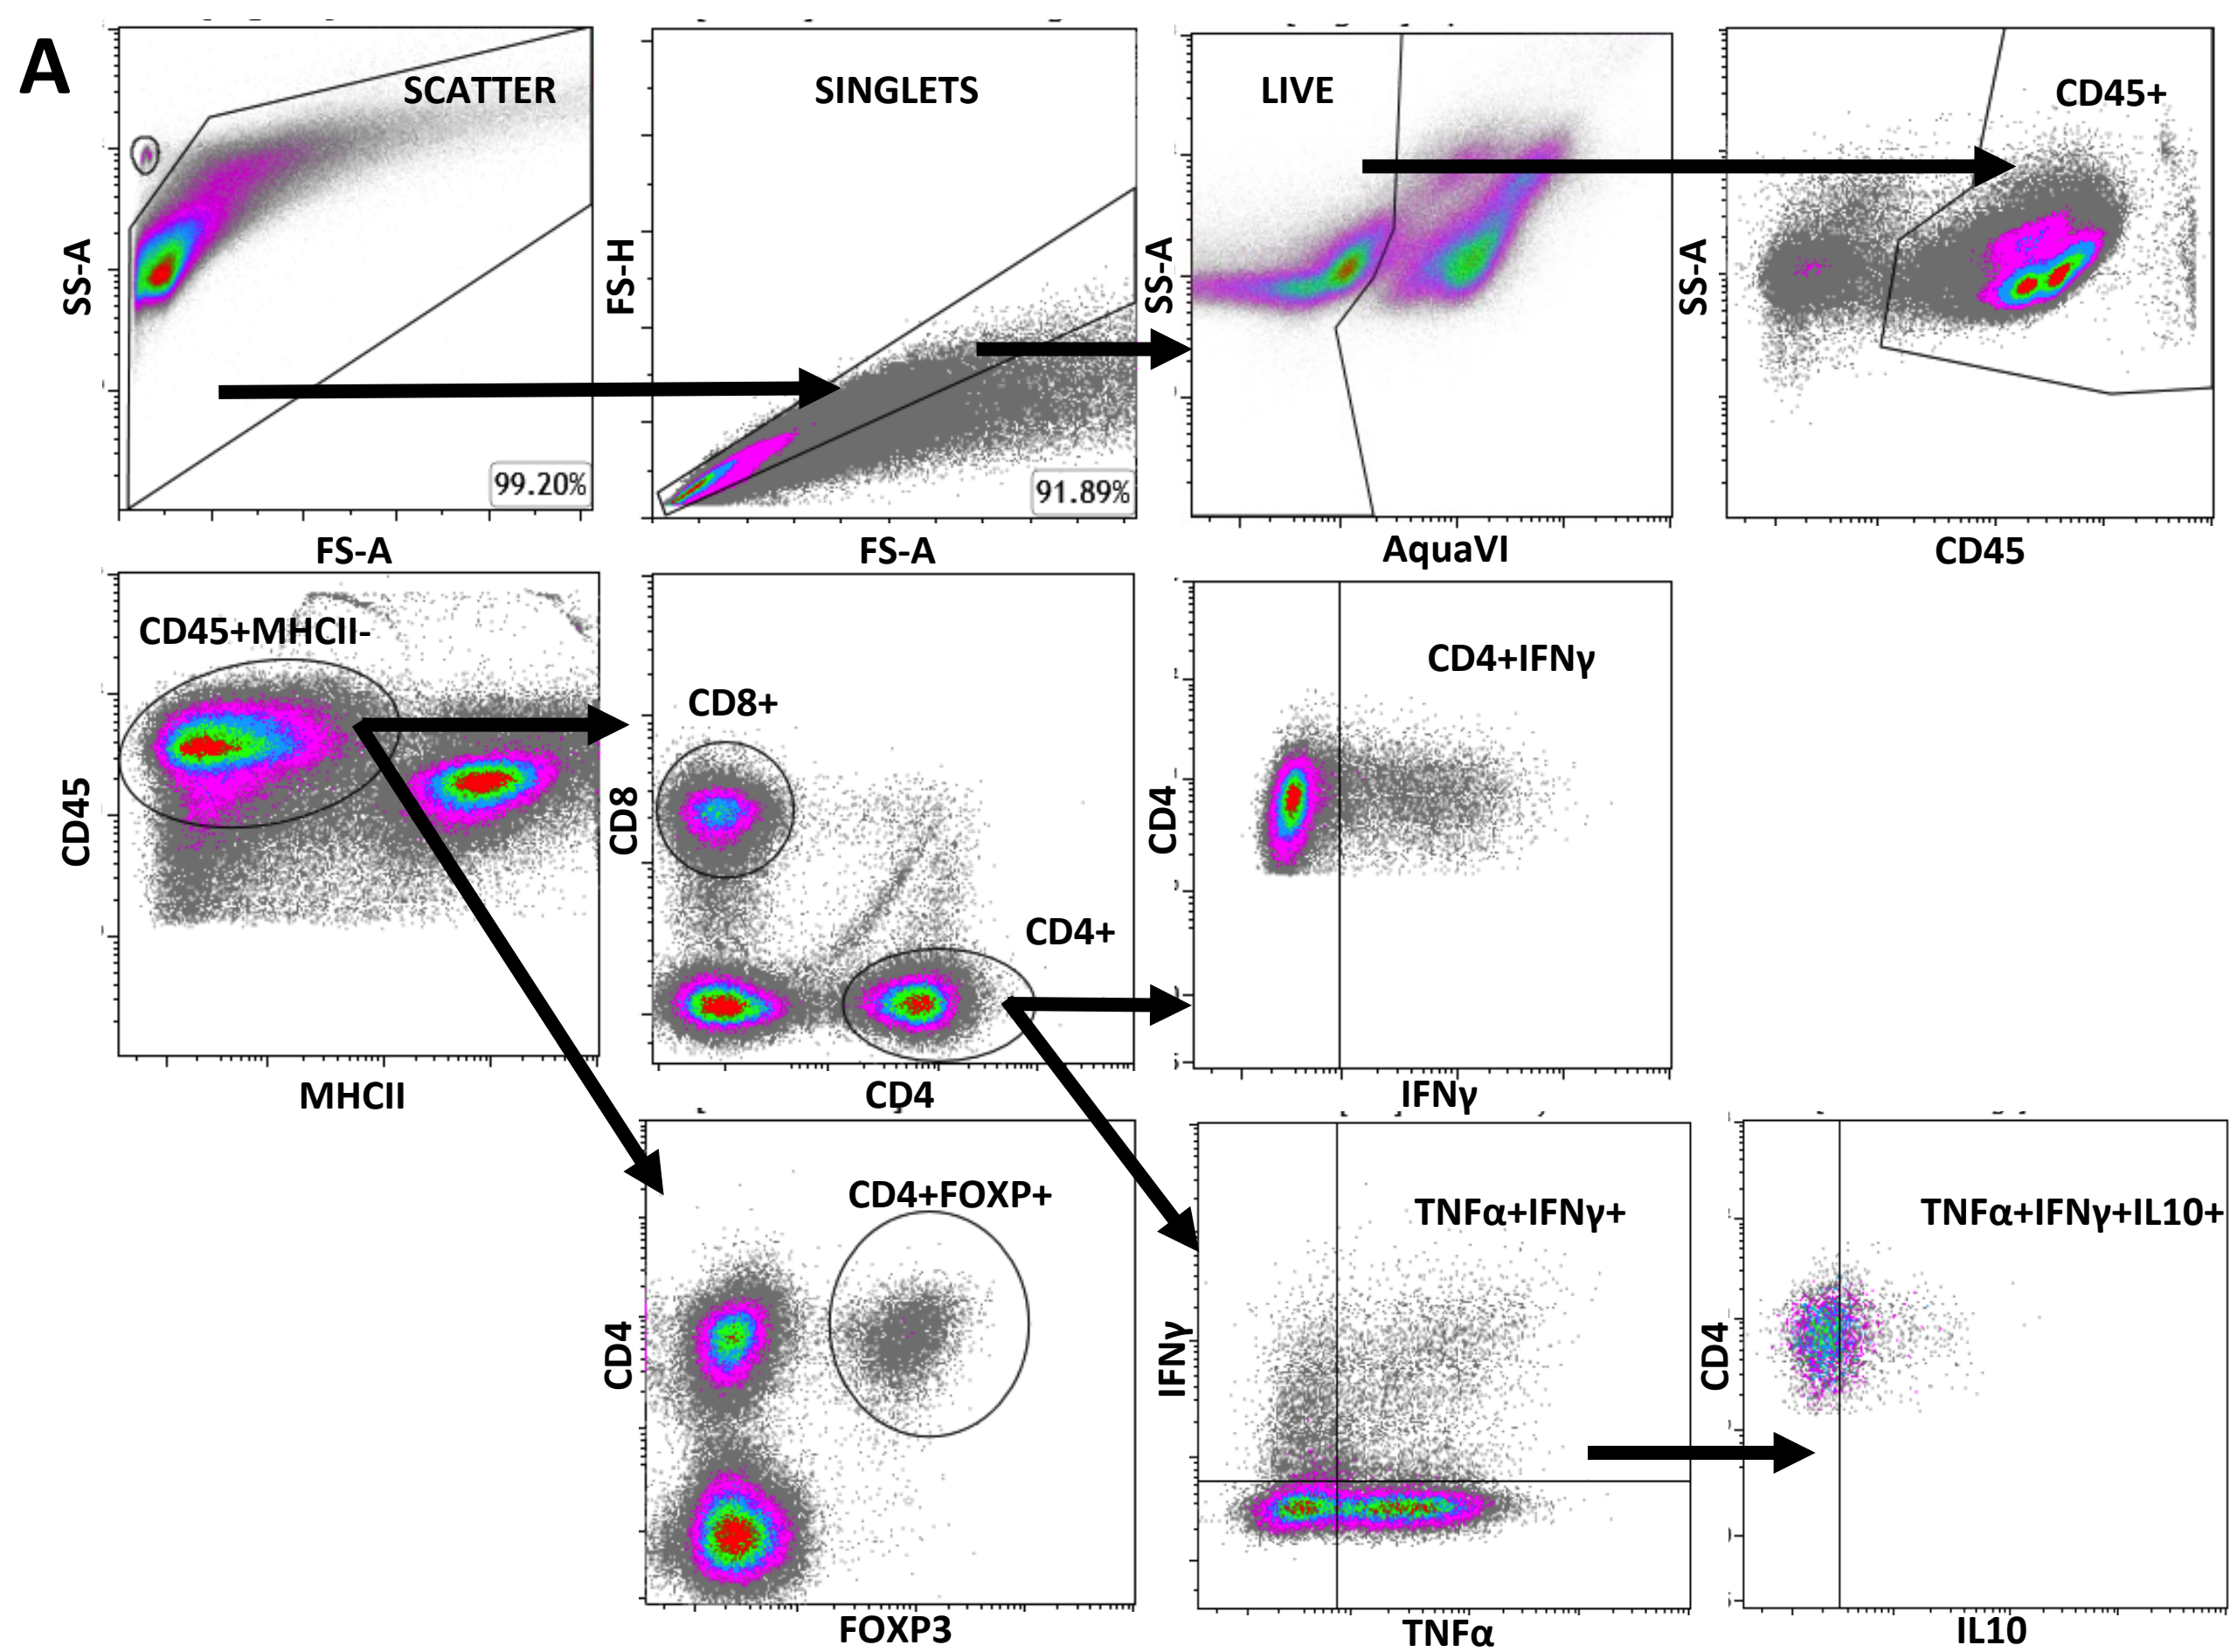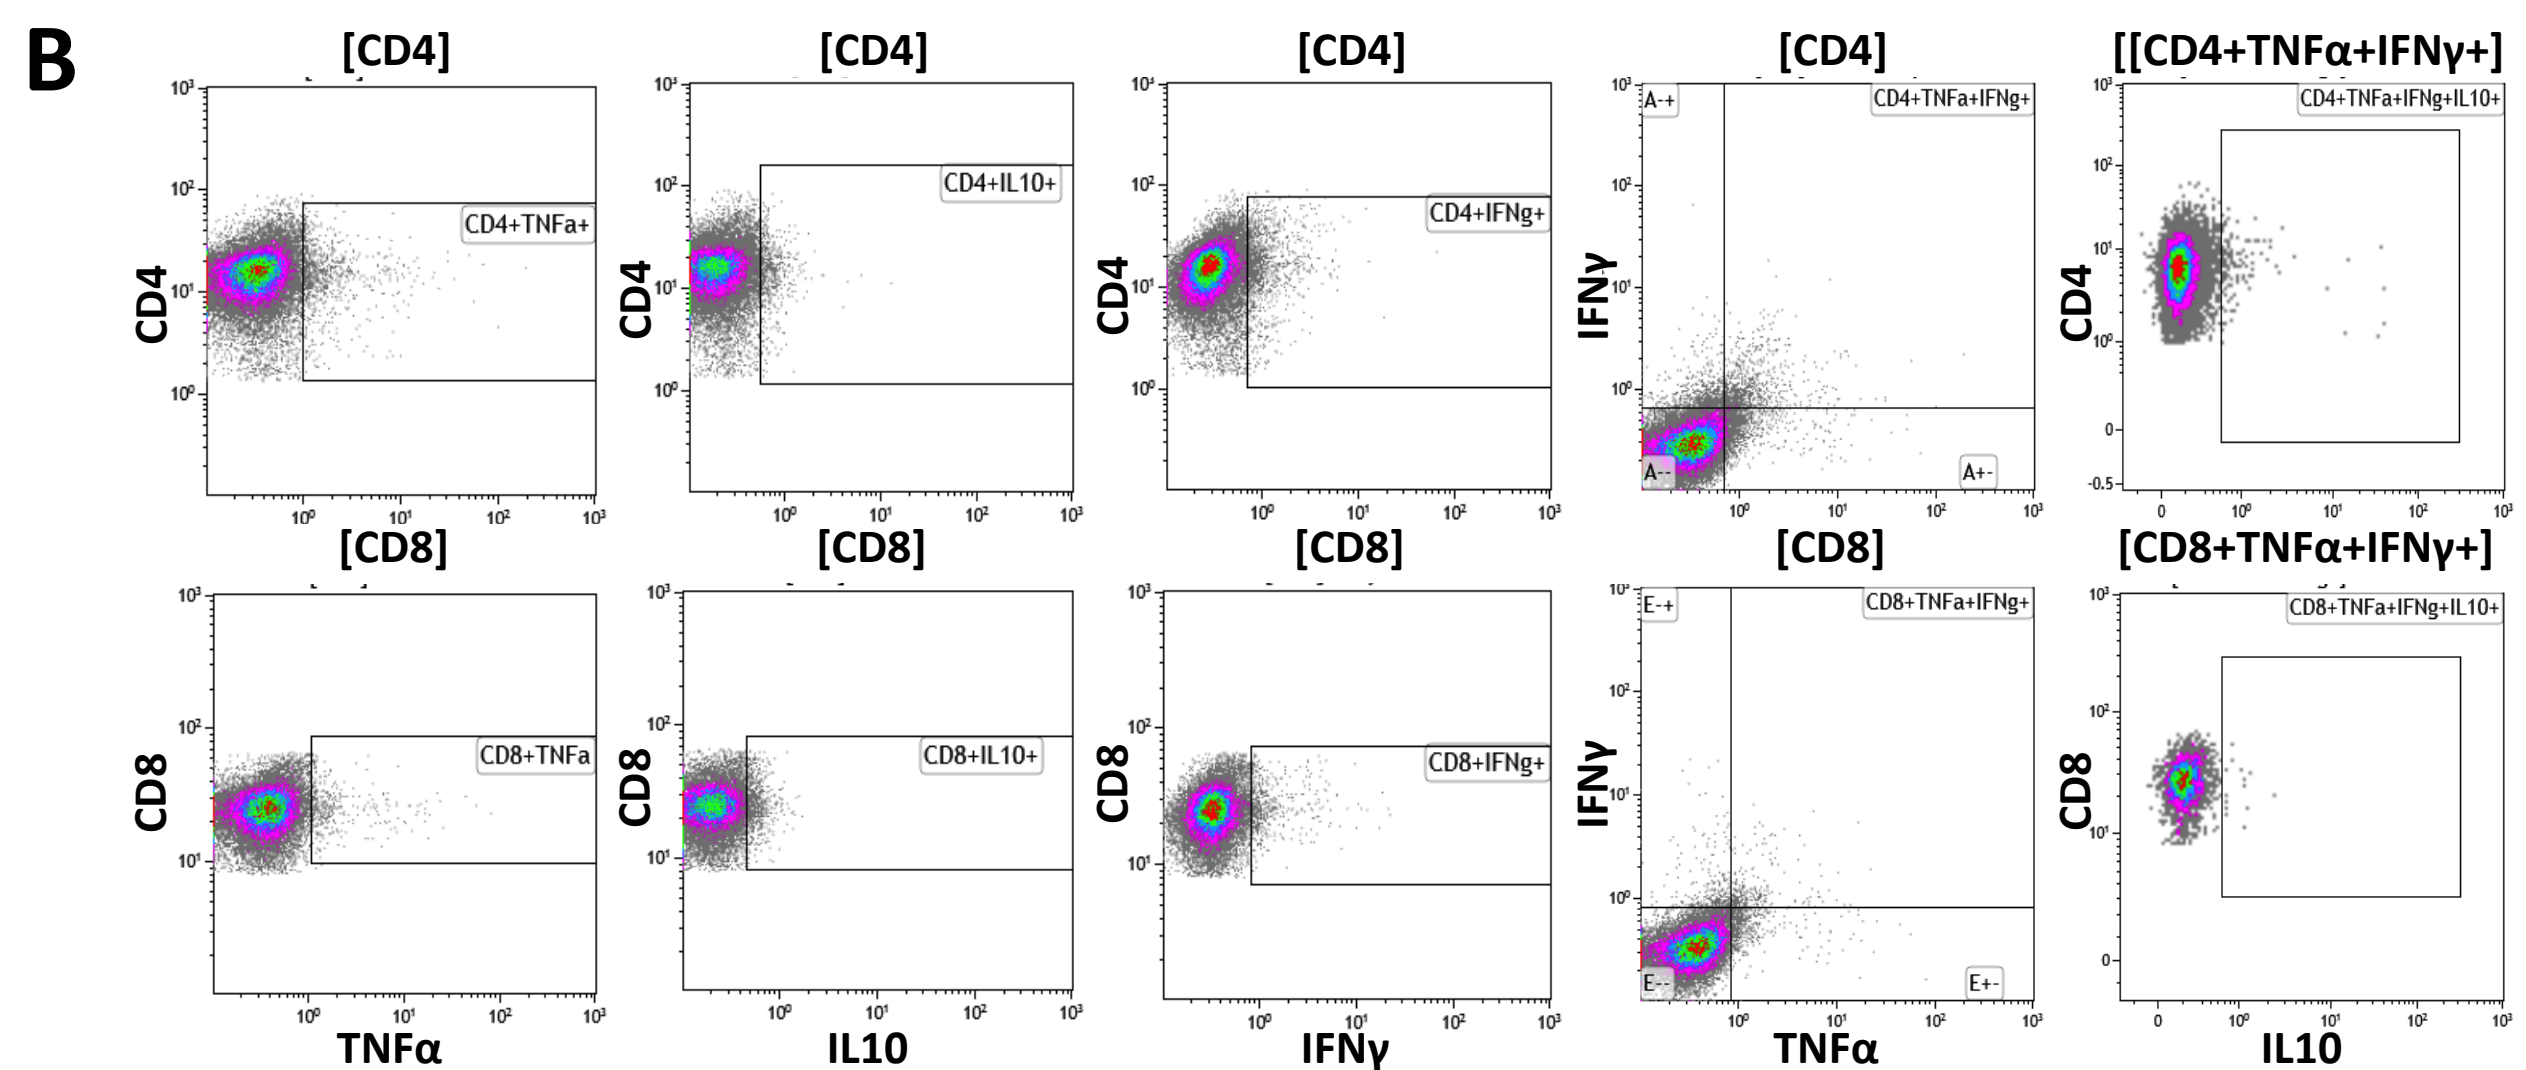

**Supplemental Figure 2. Alterations in inflammatory and immune cells in CMT-luc tumor bearing mice. (A) Flow cytometric gating strategy to characterize CD4+ and CD8+ T cell populations of cytokine expression is shown. (B) Representative flow cytometric plots of isotype gating for indicated stain(s) are shown.**

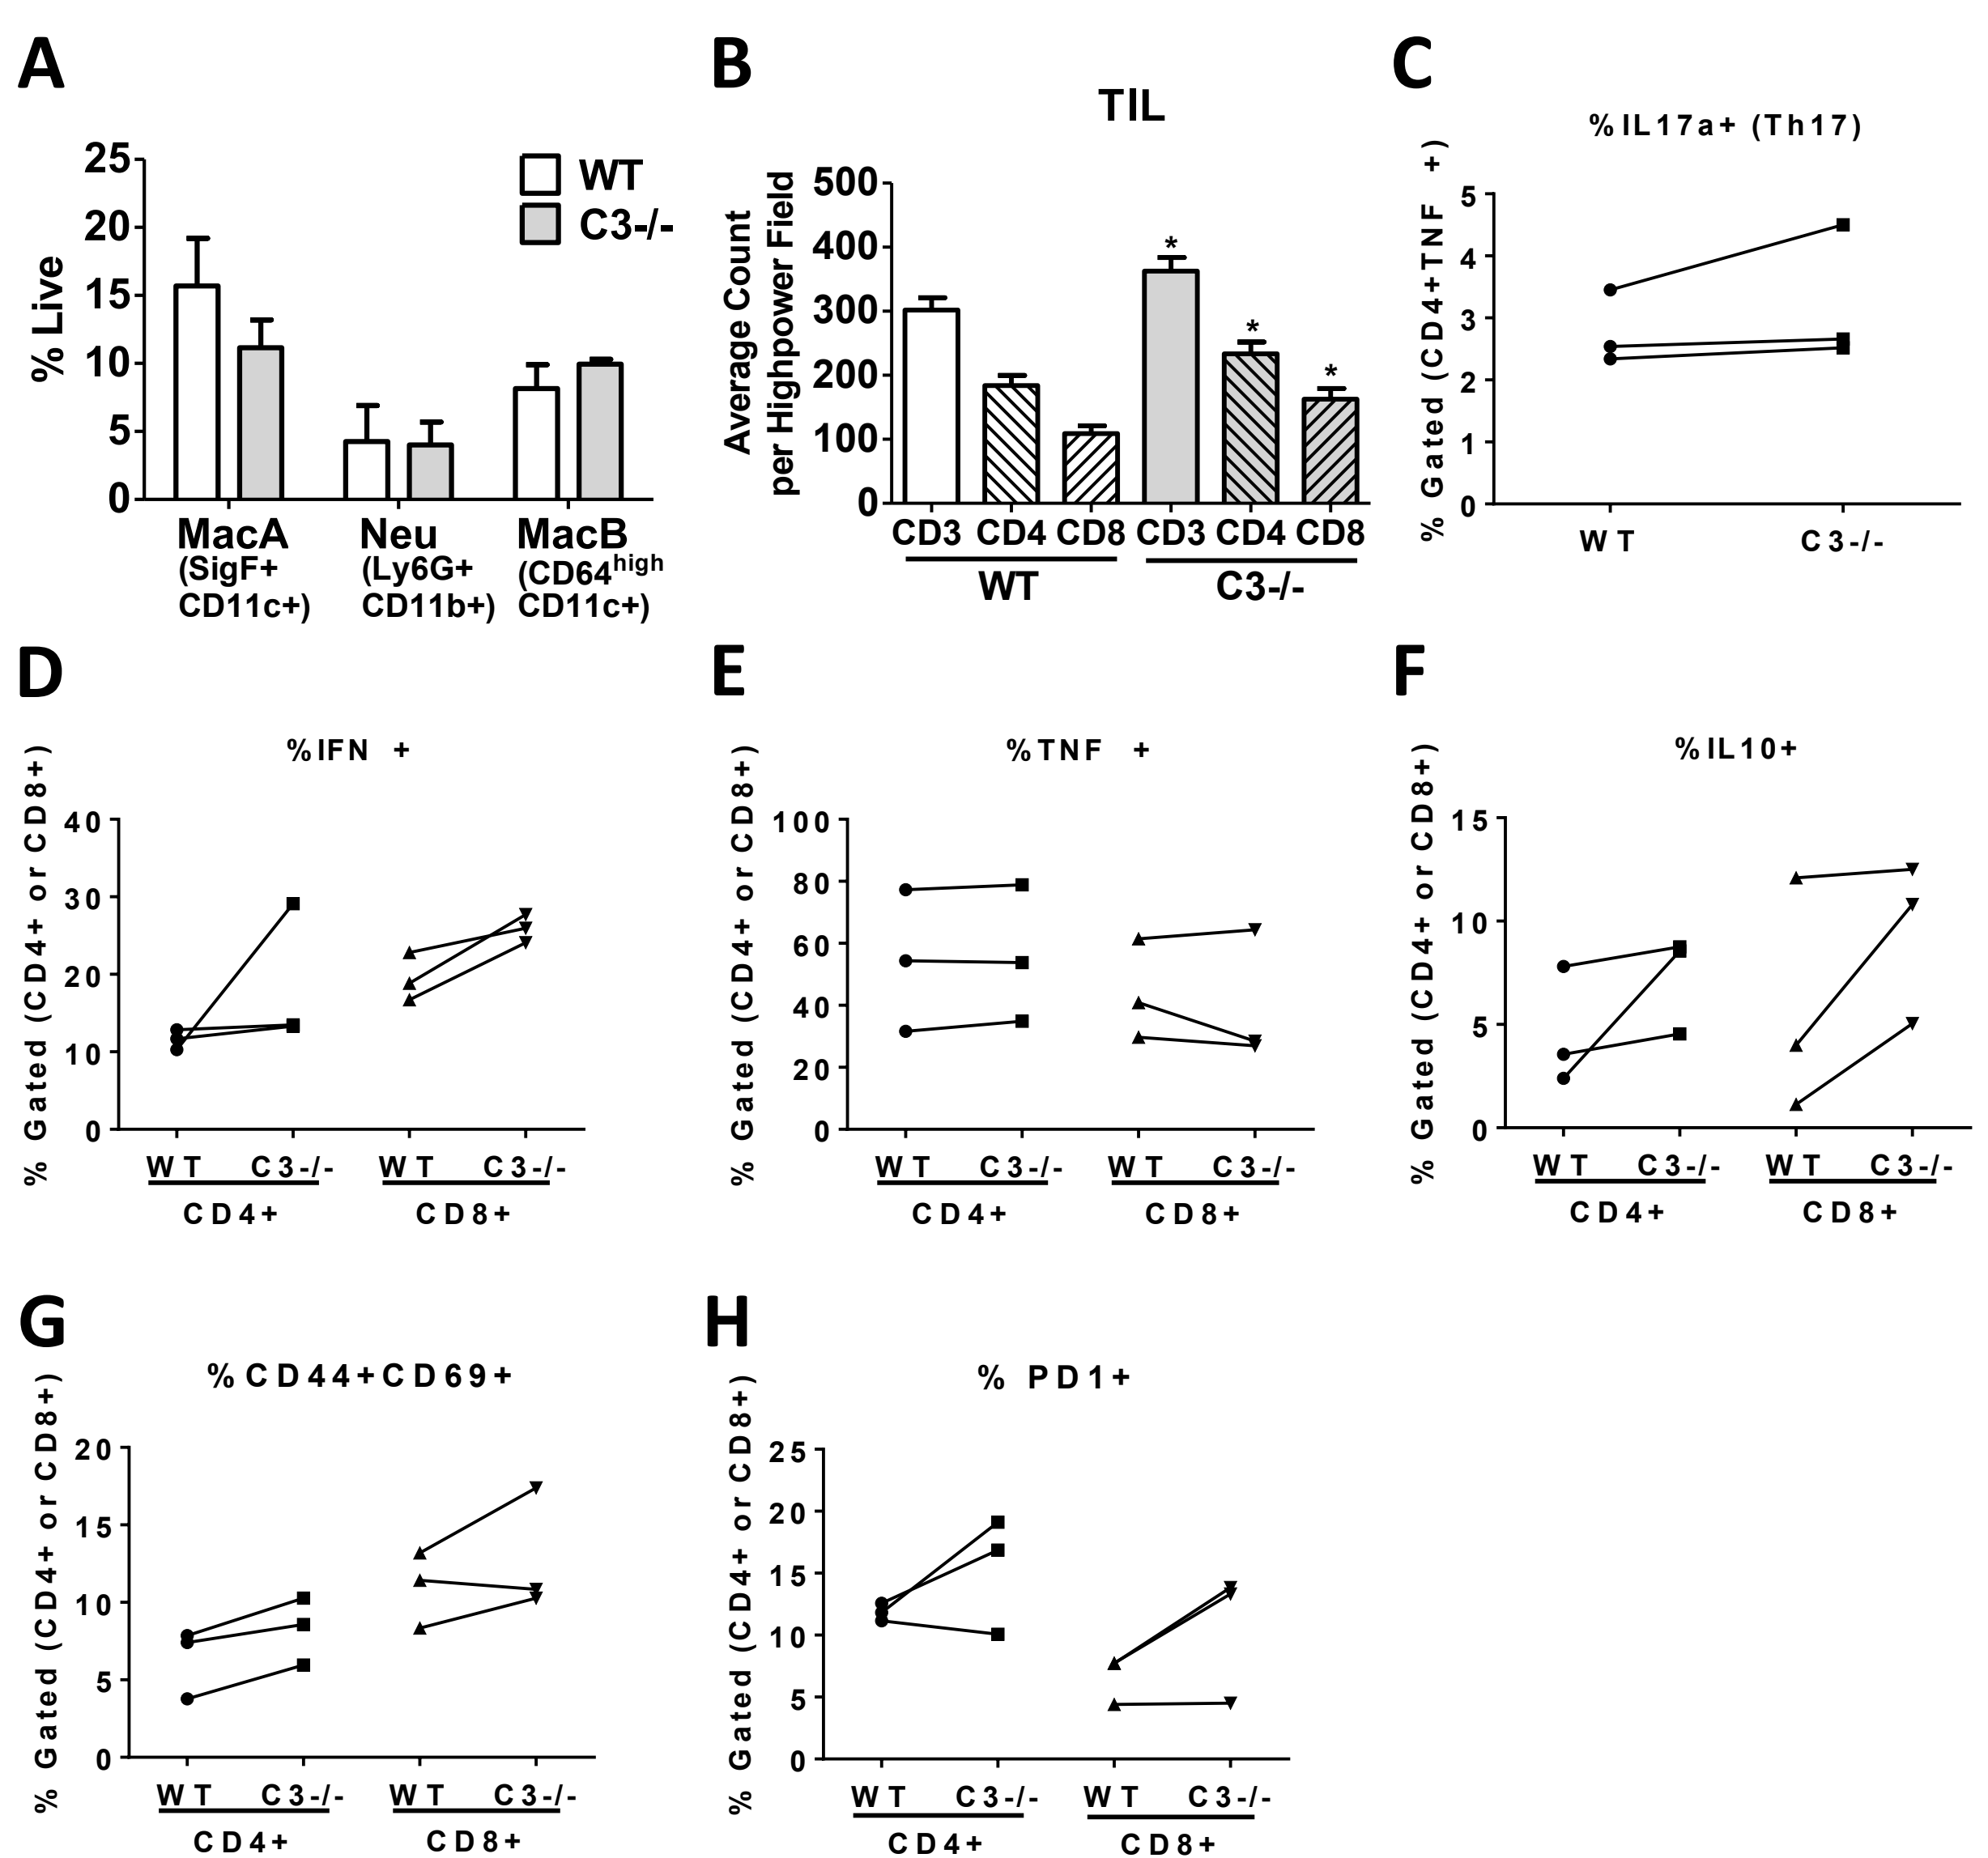

**Supplemental Figure 3. Alterations in inflammatory and immune cells in CMT-luc tumor bearing mice.** CMT-luc tumor-bearing lungs were analyzed by flow cytometry 7 and 10 days after implantation for the inflammatory populations and immune populations, respectively. (A) Average counts of tumor infiltrating CD3<sup>+</sup>, CD4<sup>+</sup>, or CD8<sup>+</sup> cells per high power field (40x) within the day 10 CMT-luc primary tumors were assessed by immunofluorescence staining (WT n = 6; C3<sup>-/-</sup> n = 4). (B) Percentages of MacA (SigF<sup>+</sup>CD11c<sup>+</sup>), Neutrophils (Ly6G<sup>+</sup>CD11b<sup>+</sup>), and MacB (CD64<sup>high</sup>CD11c<sup>+</sup>) of live cells 7 days after CMT-luc tumor implantation are shown (n = 2). The identification and flow strategy to identify the inflammatory populations are as previously described (26). (C-G) Each group represents 3 replicates of pools of 3 mice. (C) Percentages of IL-17a<sup>+</sup> of CD4<sup>+</sup>TNF<sup>+</sup> T cells are shown. Percentages of (D) IFN $\gamma$ <sup>+</sup>, (E) TNF $\alpha$ <sup>+</sup>, (F) IL10<sup>+</sup>, and (G) CD44<sup>+</sup>CD69<sup>+</sup> (H) PD1<sup>+</sup> of CD4<sup>+</sup> or CD8<sup>+</sup> cells are shown. Error bars represent mean  $\pm$  SEM.

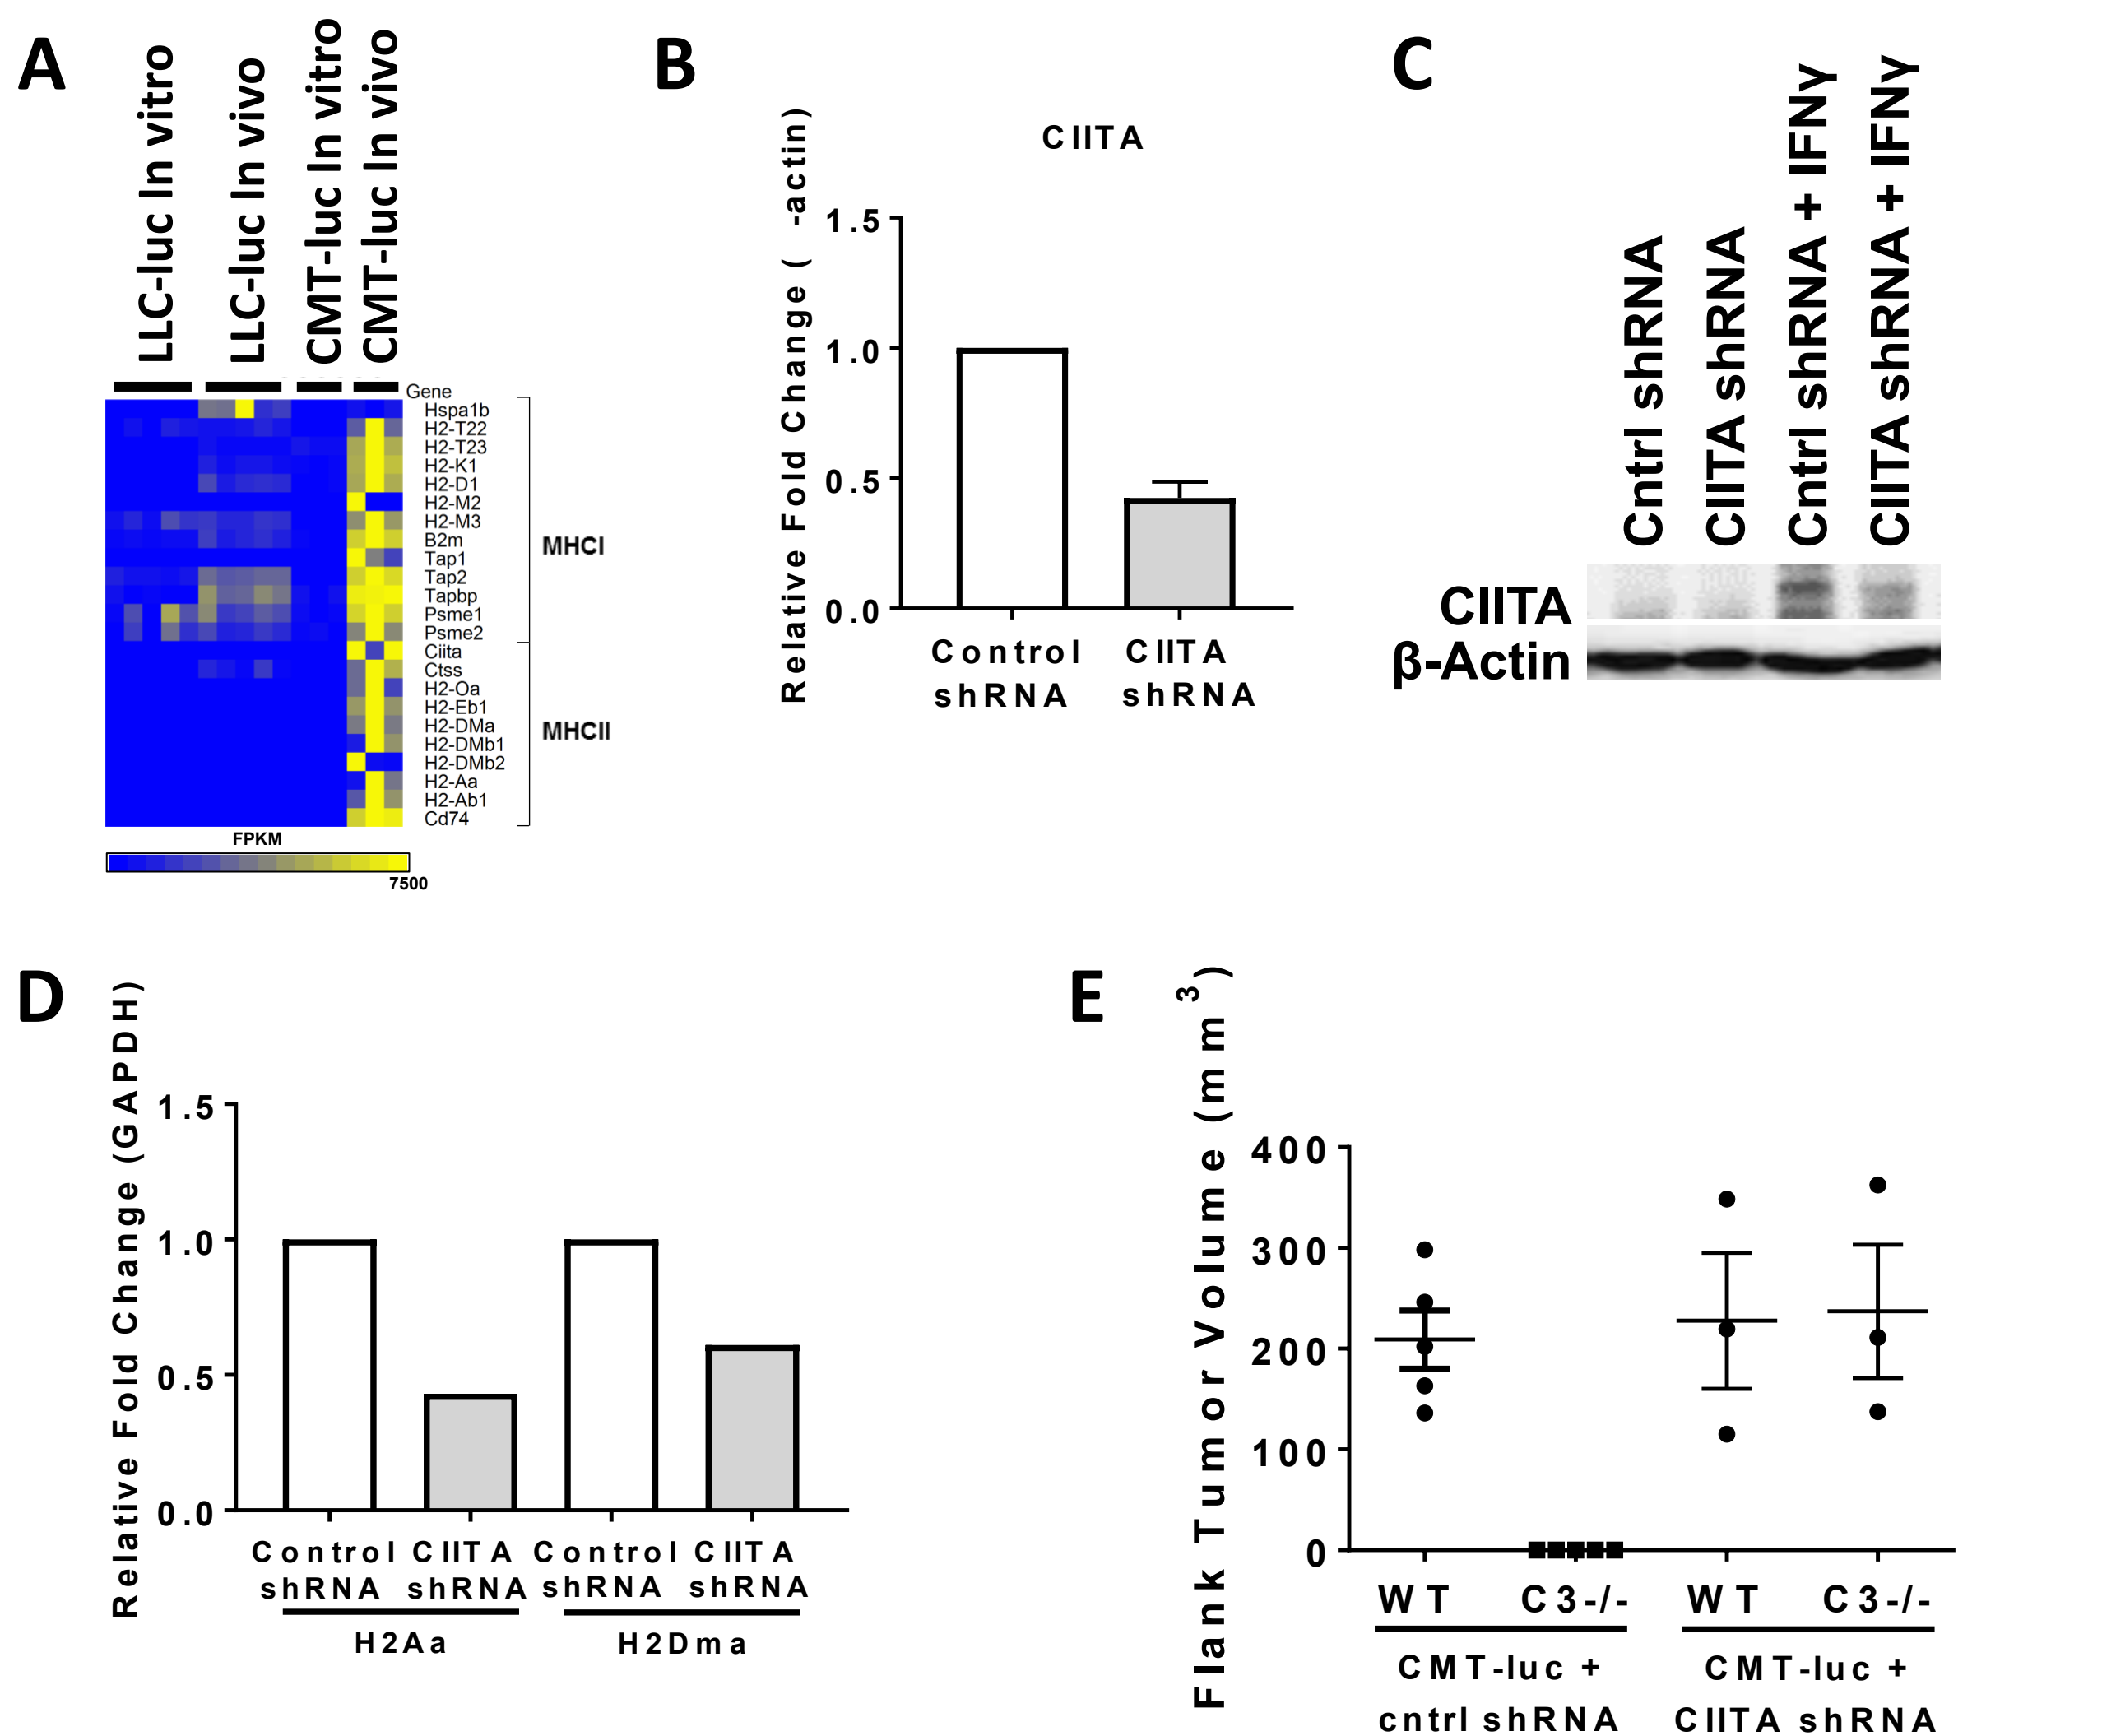

**Supplemental Figure 4. Inhibition of CiiTA Expression in CMT-luc Confers the Gain of Growth in C3<sup>-/-</sup> Mice.** (A) Heat map of the expression of MHC Class I and Class II genes in CMT-luc and LLC-luc cells in vitro versus in vivo is shown. (B-C) CiiTA gene and protein expression measured in CMT-luc with shRNA against CiiTA or scrambled control shRNA treated with IFN $\gamma$  for 24hours by qPCR and WB are shown. (D) MHC Class II genes (H2Aa and H2Dma) expression of CMT-luc with CiiTA shRNA and control shRNA were measured by qPCR after 24hours of IFN $\gamma$  treatment. (E) CMT-luc cells with CiiTA shRNA or control shRNA were injected into flanks of female WT or C3 deficient mice. The flank tumor volumes measured after 4 weeks are shown.

**A**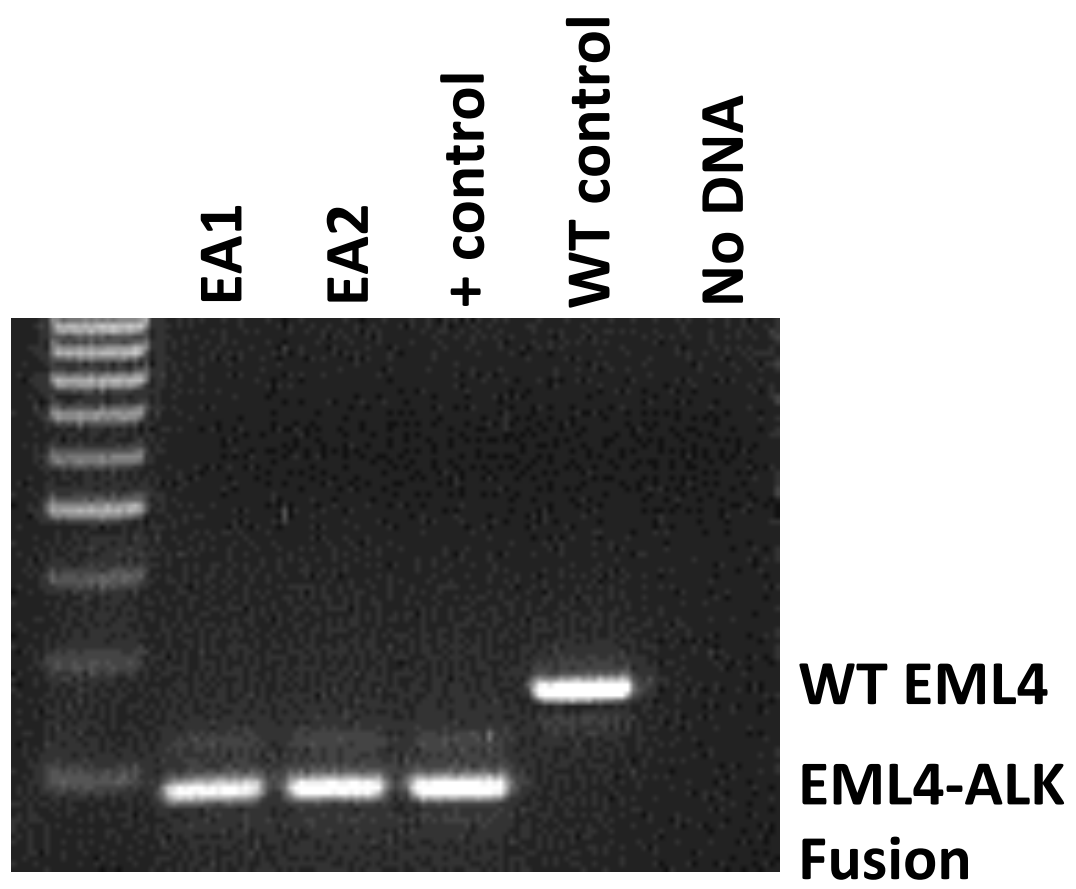**B**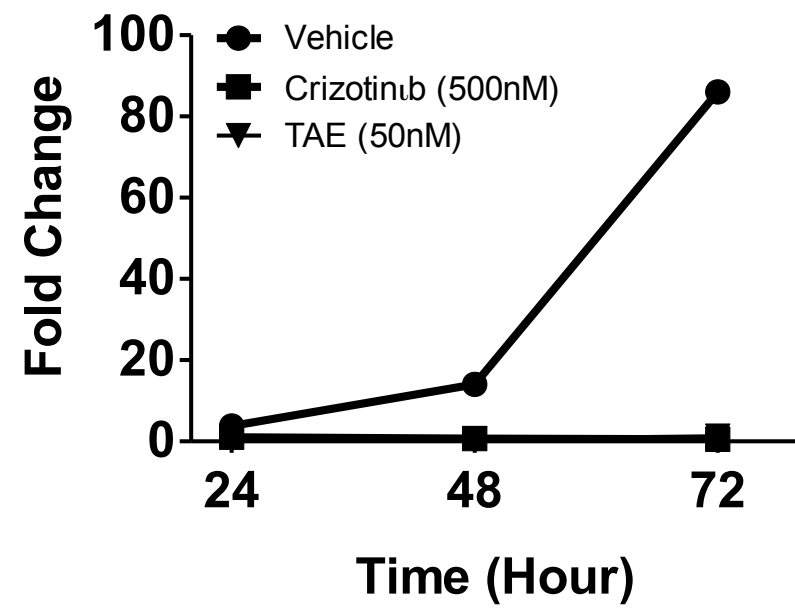**C**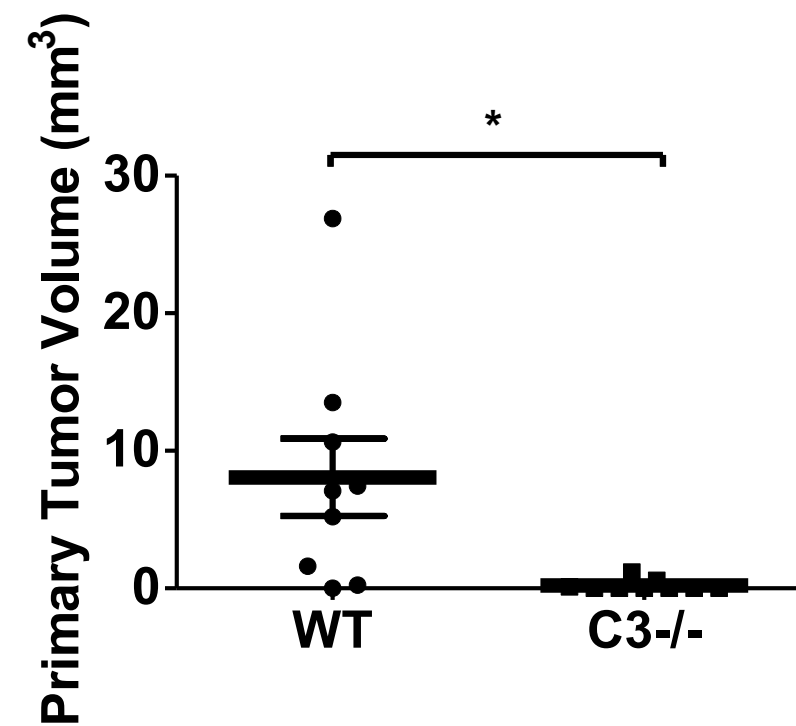

**Supplemental Figure 5. Complement depletion inhibits tumor growth of EML4-ALK driven lung cancer cell line.** (A) Genetic rearrangement of EML4-ALK in cultured tumor cells derived from animals treated with the Adenoviral construct as described previously (13). (B) Fold changes *in vitro* proliferation of EA2 cell line with treatment of Crizotinib (500nM) or TAE684 (50nM) are shown. (C) Primary tumor volumes 28 days after EML4-ALK implantation are shown, comparing WT and C3<sup>-/-</sup> recipients (n = 4). \*p < 0.05. Error bars represent mean ± SEM.

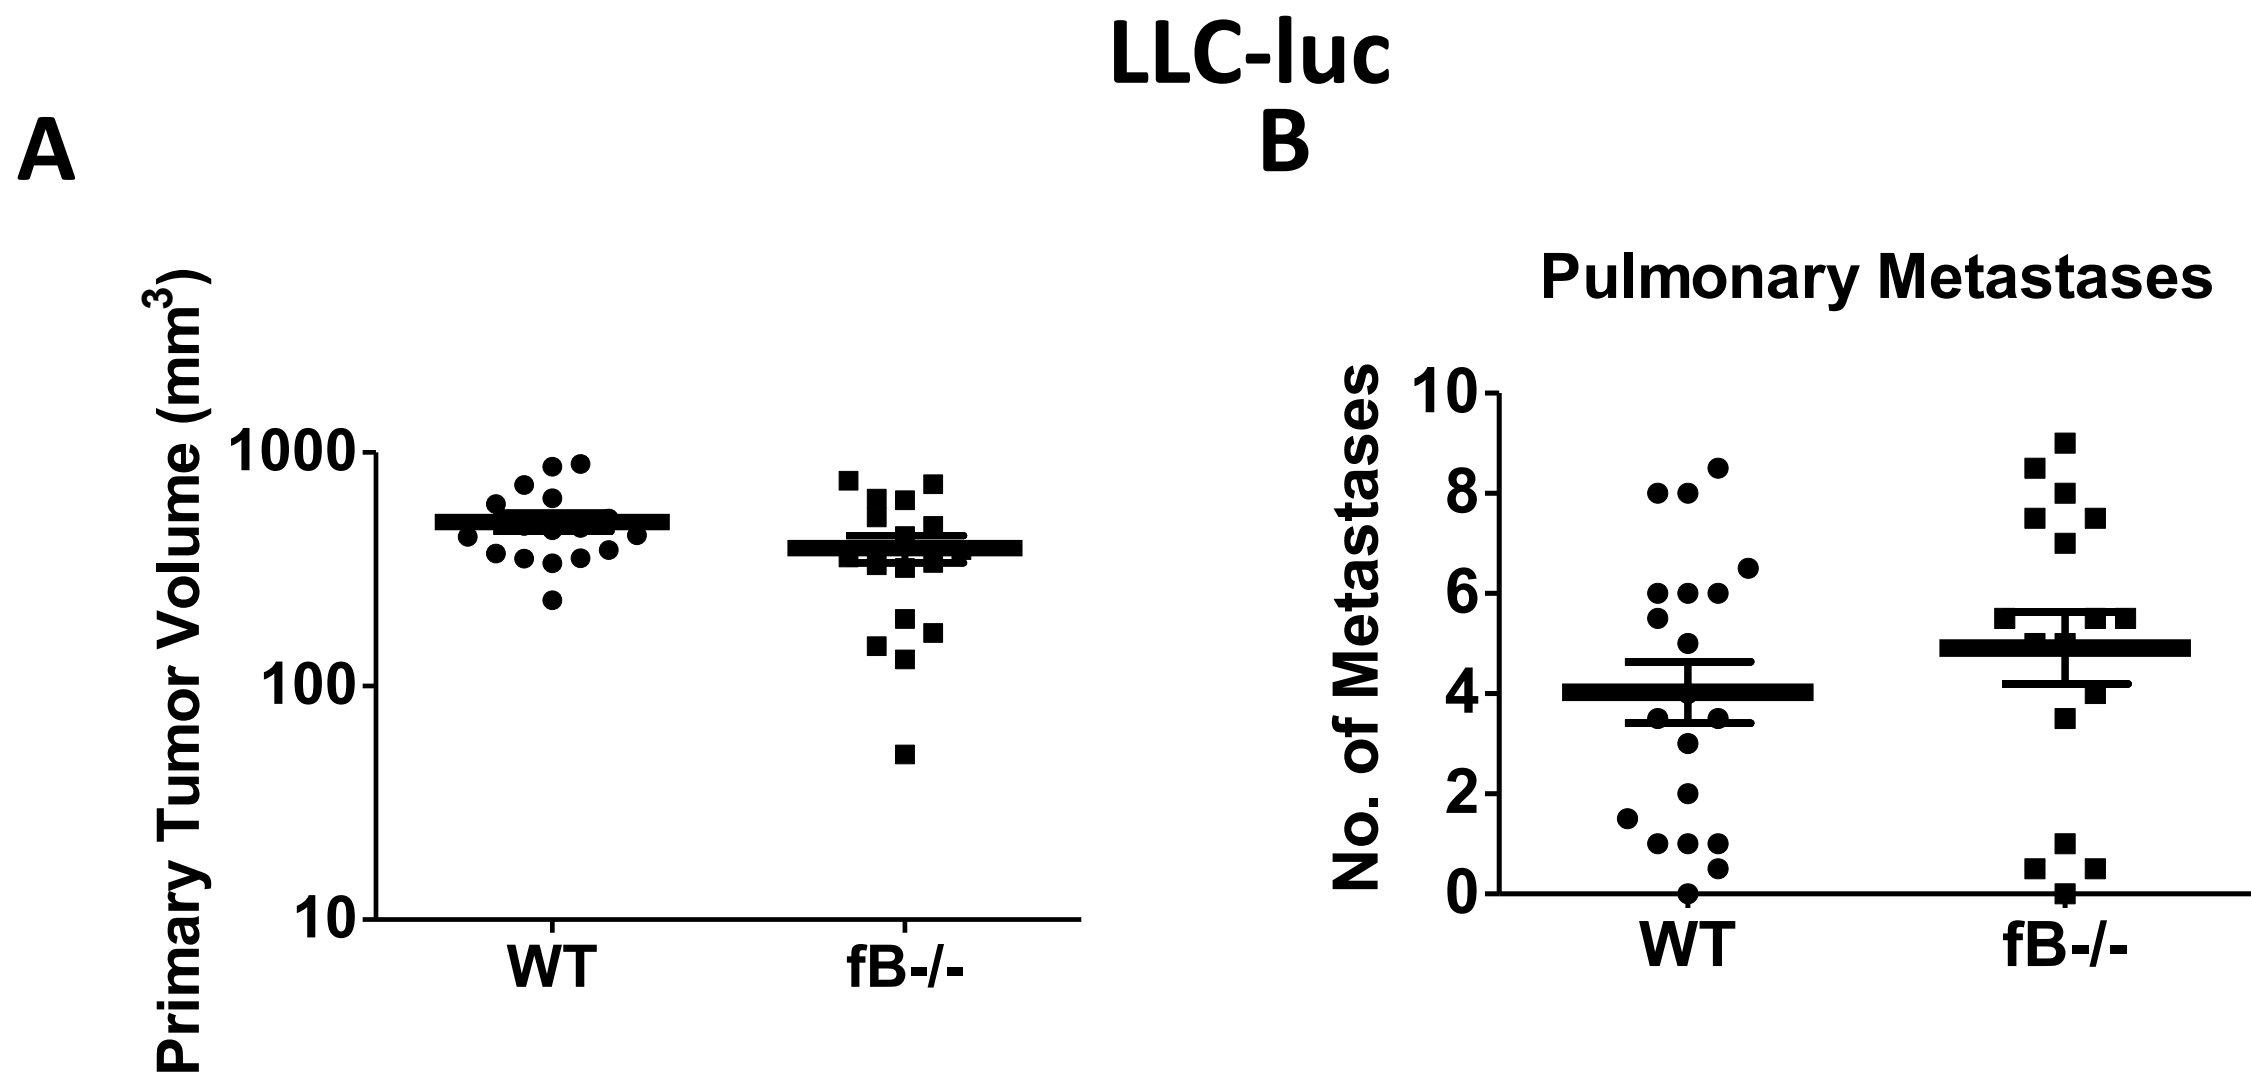

**Supplemental Figure.6 LLC Tumor Growth in factor B<sup>-/-</sup> mice** (A and B) Primary tumor volumes and the number of metastases to secondary pulmonary spaces 28 days after LLC-luc implantation in WT or fB<sup>-/-</sup> mice are shown. Error bars represent mean ± SEM.

**A**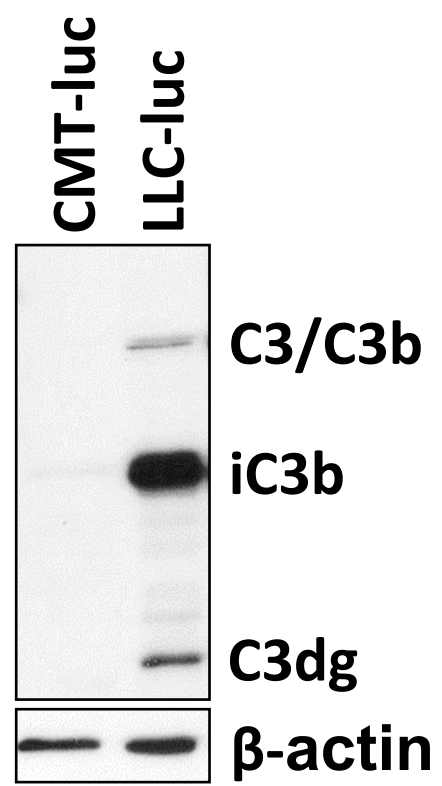**B**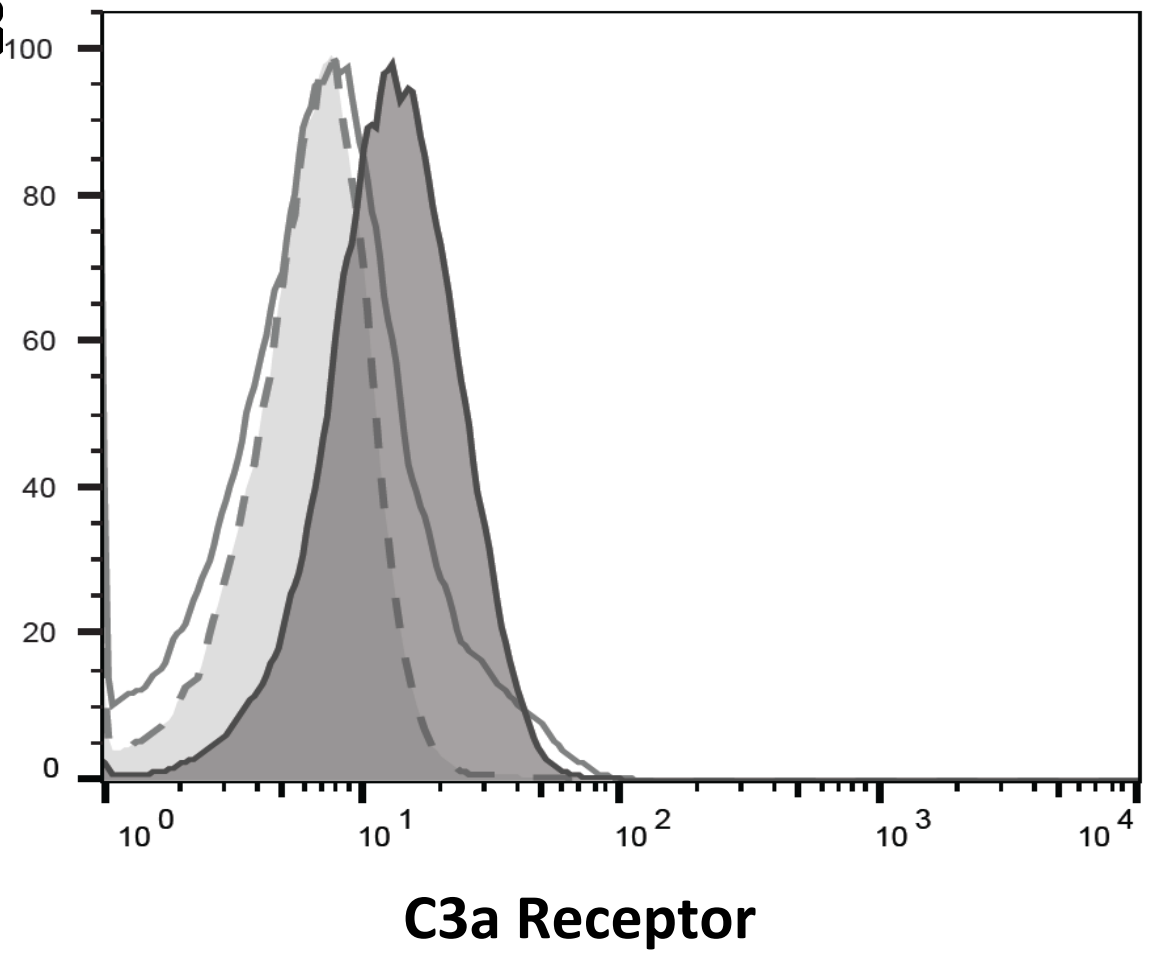

**Supplemental Figure 7. LLC-luc lung cancer cell line expresses C3 and C3aR.** (A) Western blot analysis of the whole cell lysates from CMT-luc and LLC-luc cells are shown. (B) Flow cytometric analysis of cell surface C3a receptor expression on CMT-luc and LLC-luc cell lines. (Isotype in dotted line (median = 7.35); CMT-luc in light grey (median = 10.2); LLC-luc in dark grey (median = 15.6))
