# Supplementary material
Source: PubMed Central journal article supplement (PMC5810934)
Supplement: NIHMS935629-supplement-2.pdf [file NIHMS935629-supplement-2.pdf]

|               | WT      |      |              |              | C3-/-   |      |              |              |
|---------------|---------|------|--------------|--------------|---------|------|--------------|--------------|
|               | Isotype |      | $\alpha$ CD4 | $\alpha$ CD8 | Isotype |      | $\alpha$ CD4 | $\alpha$ CD8 |
|               | CD4     | CD8  | CD4          | CD8          | CD4     | CD8  | CD4          | CD8          |
| <b>Day 0</b>  | 57.7    | 36.8 | -            | -            | 58.3    | 38.4 | -            | -            |
| <b>Day 10</b> | 61.3    | 35.2 | 0.0          | 10.2         | 59.1    | 34.7 | 0.0          | 0.3          |
| <b>Day 17</b> | 61.0    | 34.7 | 0.0          | 12.8         | 57.0    | 39.2 | 0.0          | 0.8          |

**Table 1**

Mice (WT and C3-/-) were injected intraperitoneally (10 mg/kg) with anti-CD4 antibody (Clone GK1.5, BioXcell), anti-CD8 antibody (YTS 169.4, BioXcell), both anti-CD4 and anti-CD8, antibodies, or control IgG (rat IgG2A Clone 2A3 or rat IgG3B Clone LFT-2, BioXcell) twice a week. After RBC lysis, samples were analyzed by flow cytometry for CD3, CD4 and CD8 cells. The results show %of CD3 for both CD4 and CD8 cells at various time points.
